# Supplementary material for: Selective enhancement of red emission from upconversion nanoparticles via surface plasmon-coupled emission
Source: Royal Society of Chemistry journal article supplement (doi:10.1039/c5ra13184g), 2015-01-01
Supplement: c5ra13184g1.pdf [file c5ra13184g1.pdf]

## Supplementary Information

### Selective enhancement of red emission from upconversion nanoparticles *via* surface plasmon-coupled emission

Ai Ling Feng,<sup>abc</sup> Min Lin,<sup>\*acd</sup> Limei Tian,<sup>e</sup> Hong Yuan Zhu,<sup>ac</sup> Hui Guo,<sup>ac</sup> Srikanth Singamaneni,<sup>e</sup> Zhenfeng Duan,<sup>d</sup> Tian Jian Lu<sup>c</sup> and Feng Xu<sup>\*ac</sup>

<sup>a</sup> The MOE Key Laboratory of Biomedical Information Engineering, School of Life Science and Technology, Xi'an Jiaotong University, Xi'an 710049, P.R. China. E-mail: fengxu@mail.xjtu.edu.cn, minlin@mail.xjtu.edu.cn

<sup>b</sup> Institute of Physics & Optoelectronics Technology, Baoji University of Arts and Sciences, Baoji 721016, China

<sup>c</sup> Bioinspired Engineering and Biomechanics Center (BEBC), Xi'an Jiaotong University, Xi'an 710049, P.R. China

<sup>d</sup> Center for Sarcoma and Connective Tissue Oncology, Massachusetts General Hospital, Harvard Medical School, MA 02114, USA

<sup>e</sup> Department of Mechanical Engineering and Materials Science, Institute of Materials Science and Engineering, Washington University in St. Louis, St Louis, MO 63130, USA

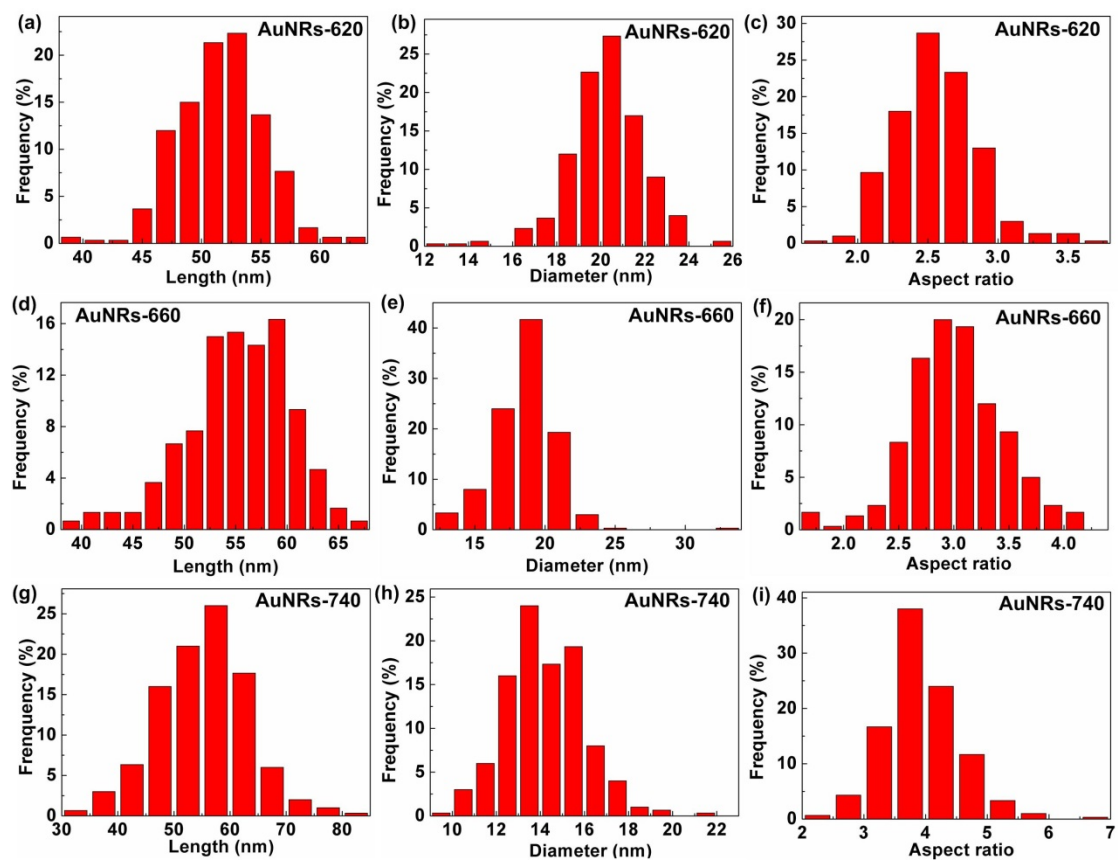

**Fig. S1** Statistical analysis of size distribution including length, diameter and aspect ratios of the AuNRs. a-c) AuNRs-620; d-f) AuNRs-660 and g-i) AuNRs-740.

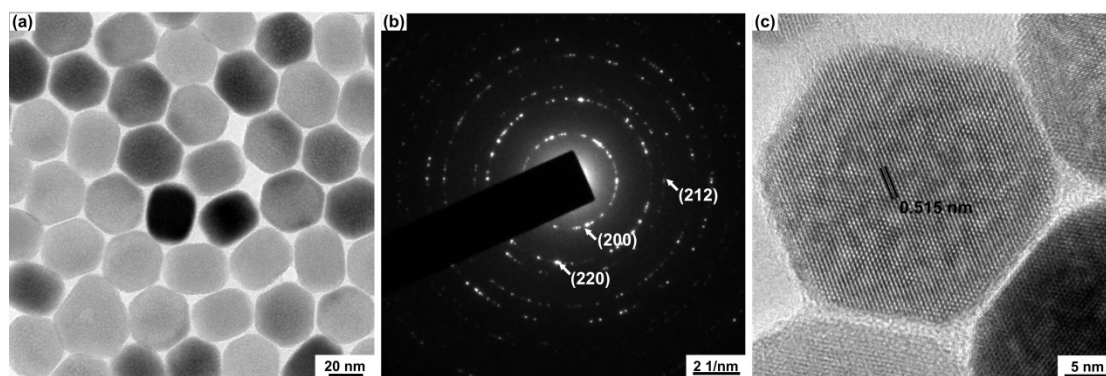

**Fig. S2** Characterization of UCNPs. a) Representative TEM image. b) Diffraction pattern. c) HRTEM.

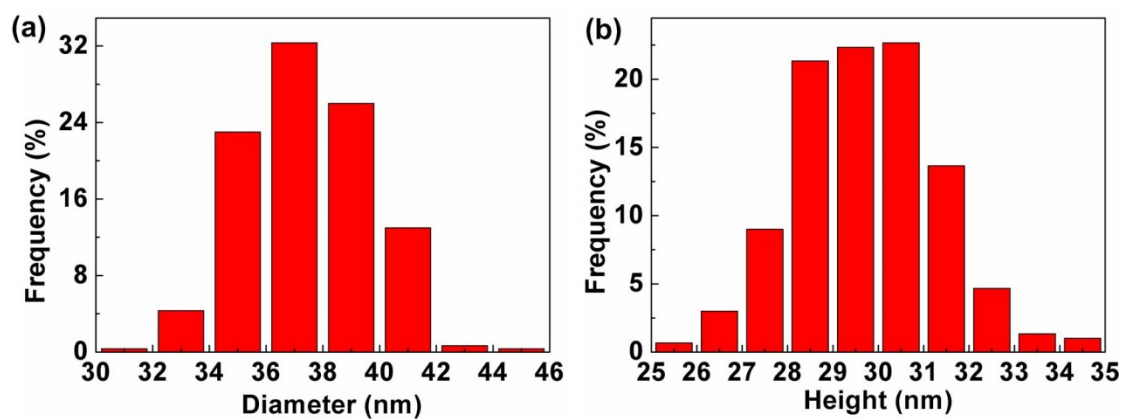

**Fig. S3** Statistical analysis of size distribution. a) Diameter and b) Height of six prism-shaped UCNPs-PAA.

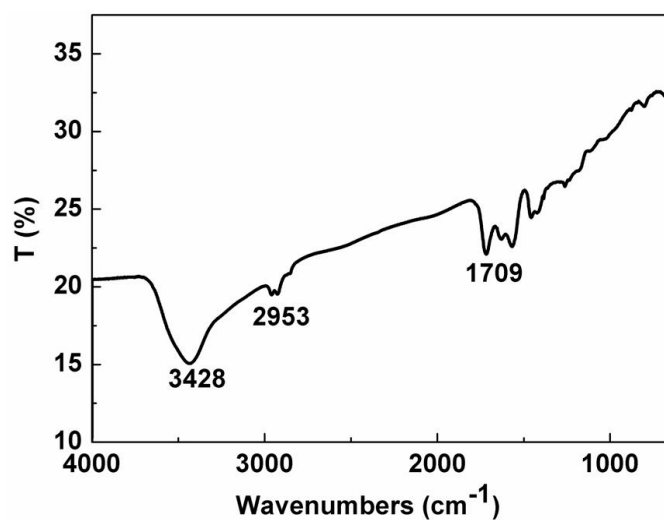

**Fig. S4** FT-IR spectrum of UCNPs-PAA, indicating the existence of -COOH group.

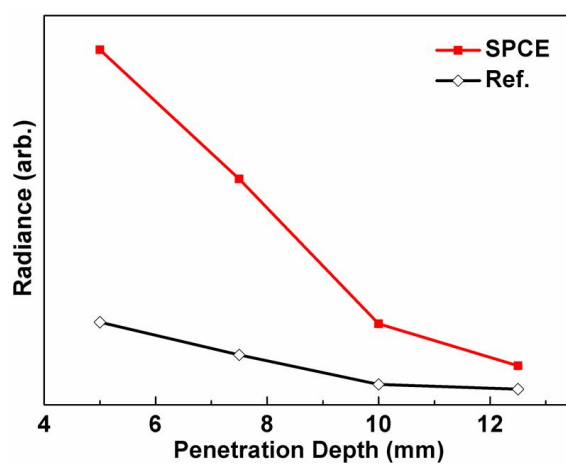

**Fig. S5** Quantitative analysis of the relationship between the radiance and penetration depth for the samples of the UCNPs in combination with plasmon nanostructures of AuNRs-660 spaced by 8 nm polyelectrolyte multilayers and only UCNPs as reference (Ref.) collected at red emission of 650 nm.

**Table S1** Statistical analysis of size distribution for AuNRs.

| Parameters  | AuNRs-620      |                   |                 | AuNRs-660      |                   |                 | AuNRs-740      |                   |                 |
|-------------|----------------|-------------------|-----------------|----------------|-------------------|-----------------|----------------|-------------------|-----------------|
|             | Length<br>(nm) | Diamete<br>r (nm) | Aspect<br>Ratio | Length<br>(nm) | Diamete<br>r (nm) | Aspect<br>Ratio | Length<br>(nm) | Diamete<br>r (nm) | Aspect<br>Ratio |
| <b>Mean</b> | 51.6           | 20.3              | 2.6             | 55.2           | 18.6              | 3.0             | 55.2           | 14.2              | 3.9             |
| <b>Max</b>  | 62.4           | 25.5              | 3.7             | 67.5           | 32.3              | 4.2             | 83.5           | 22.0              | 6.5             |
| <b>Min</b>  | 38.6           | 12.5              | 1.8             | 38.9           | 13.2              | 1.7             | 32.3           | 9.8               | 2.2             |
| <b>SD</b>   | 3.6            | 1.7               | 0.3             | 5.1            | 2.2               | 0.4             | 8.2            | 1.8               | 0.6             |

**Table S2** Statistical analysis of size distribution for UCNPs-PAA.

|             | Diameter<br>(nm) | Height (nm) |
|-------------|------------------|-------------|
| <b>Mean</b> | 37.5             | 29.7        |
| <b>Max</b>  | 45.8             | 38.6        |
| <b>Min</b>  | 30.4             | 25.5        |
| <b>SD</b>   | 2.2              | 1.7         |

**Table S3** LSPR wavelength of AuNRs on different conditions.

| Nomenclatur<br>e | LSPR wavelength<br>in solution (nm) | LSPR wavelength<br>on silicon (nm) | Blue-shift (nm) |
|------------------|-------------------------------------|------------------------------------|-----------------|
| <b>AuNRs-620</b> | 670                                 | 620                                | 50              |
| <b>AuNRs-660</b> | 725                                 | 660                                | 65              |
| <b>AuNRs-740</b> | 810                                 | 740                                | 70              |
